# Supplementary material for: Association between Food Preferences and Food Habits in a Polish Adolescents’ COVID-19 Experience (PLACE-19) Study
Source: MDPI journal article supplement (doi:10.3390/nu13093003), 2021-08-28
Supplement: s1 [file s1]

Supplementary Material

# Analysis of Gender-Dependent Association between Food Preferences and Food Habits in a Polish Adolescents' COVID-19 Experience (PLACE-19) Study

Dominika Skolmowska <sup>1</sup>, Dominika Głabska <sup>1,\*</sup> and Dominika Guzek <sup>2</sup>

**Supplementary Table S1.** The summary of the comparison of the declared food habits assessed based on Adolescents' Food Habits Checklist (AFHC) in the clusters stratified based on the preferences assessed while using Food Preference Questionnaire (FPQ) within the population of the second phase of the Polish Adolescents' COVID-19 Experience (PLACE-19) Study for female and male respondents.

| Declared Food Habits Based on AFHC *   |                                                                                                     | Difference of Declared Frequency of Habit between Clusters |                     |
|----------------------------------------|-----------------------------------------------------------------------------------------------------|------------------------------------------------------------|---------------------|
|                                        |                                                                                                     | Female                                                     | Male                |
| Food purchase habits                   | If I am having lunch away from home, I often choose a low-fat option                                | ns                                                         | ↑ 'low-preferring'  |
|                                        | If I am buying crisps, I often choose a low-fat brand                                               | ↑ 'low-preferring'                                         | ns                  |
|                                        | I often buy pastries or cakes                                                                       | ↓ 'low-preferring'                                         | ↑ 'hedonists'       |
|                                        | I rarely eat takeaway meals                                                                         | ↓ 'low-preferring'                                         | ↓ 'low-preferring'  |
|                                        | When I am buying a soft drink, I usually choose a diet drink                                        | ns                                                         | ns                  |
| Food preparation habits                | If I am having a dessert or pudding in a restaurant, I usually choose the healthiest one            | ↑ 'low-preferring'                                         | ns                  |
|                                        | I usually avoid eating fried foods                                                                  | ↑ 'low-preferring'                                         | ns                  |
|                                        | I try to keep my overall fat intake down                                                            | ns                                                         | ↑ 'low-preferring'  |
|                                        | I try to keep my overall sugar intake down                                                          | ns                                                         | ns                  |
|                                        | If I am having a dessert at home, I try to have something low in fat                                | ↓ 'high-preferring'                                        | ↑ 'low-preferring'  |
|                                        | I usually eat at least one serving of vegetables (excluding potatoes) or salad with my evening meal | ↑ 'high-preferring'                                        | ↓ 'low-preferring'  |
|                                        | When I put butter or margarine on bread, I usually spread it thinly                                 | ↓ 'low-preferring'                                         | ↓ 'low-preferring'  |
|                                        | If I have a packed lunch, I usually include some chocolate and/or biscuits                          | ↑ 'high-preferring'                                        | ns                  |
|                                        | I often have cream on desserts                                                                      | ↓ 'low-preferring'                                         | ↓ 'low-preferring'  |
|                                        | I usually eat a dessert or pudding if there is one available                                        | ↓ 'high-preferring'                                        | ↓ 'high-preferring' |
| Food consumption habits                | I make sure I eat at least one serving of fruit a day                                               | ↓ 'low-preferring'                                         | ↓ 'low-preferring'  |
|                                        | I avoid eating lots of sausages and burgers                                                         | ↓ 'low-preferring'                                         | ↑ 'hedonists'       |
|                                        | I make sure I eat at least one serving of vegetables or salad a day                                 | ↑ 'high-preferring'                                        | ↓ 'low-preferring'  |
|                                        | I try to ensure I eat plenty of fruit and vegetables                                                | ↑ 'high-preferring'                                        | ↑ 'high-preferring' |
|                                        | I often eat sweet snacks between meals                                                              | ns                                                         | ↓ 'high-preferring' |
|                                        | When I have a snack between meals, I often choose fruit                                             | ↓ 'low-preferring'                                         | ↓ 'low-preferring'  |
|                                        | I eat at least three servings of fruit most days                                                    | ns                                                         | ↑ 'high-preferring' |
| I generally try to have a healthy diet |                                                                                                     | ns                                                         | ns                  |

\* AFHC—Adolescents' Food Habits Checklist; ns—not significant.
